# Supplementary material for: Rapid Construction of Stable Infectious Full-Length cDNA Clone of Papaya Leaf Distortion Mosaic Virus Using In-Fusion Cloning
Source: MDPI journal article supplement (doi:10.3390/v7122935), 2015-12-01
Supplement: s1 [file s1]

## Supplementary Material:

### Rapid Construction of Stable Infectious Full-Length cDNA Clone of Papaya Leaf Distortion Mosaic Virus Using In-Fusion Cloning

**Table S1.** Mutations in full-length cDNA of PLDMV-DF for different pT7-PLDMV colonies.

| Clone      | Nucleotide position (nt)<br>of mutation |      | Mutation              |
|------------|-----------------------------------------|------|-----------------------|
|            | P3                                      | CI   |                       |
| pT7-PLDMV1 | 3565                                    | -    | TCA→TAA (non-sense)   |
| pT7-PLDMV2 | -                                       | 4998 | A→deletion (deletion) |
| pT7-PLDMV3 | -                                       | 4554 | CGA→TGA (non-sense)   |
| pT7-PLDMV4 | -                                       | 4998 | A→deletion (deletion) |
| pT7-PLDMV5 | -                                       | 4995 | A→deletion (deletion) |

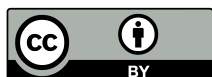

© 2015 by the authors; licensee MDPI, Basel, Switzerland. This article is an open access article distributed under the terms and conditions of the Creative Commons by Attribution (CC-BY) license (<http://creativecommons.org/licenses/by/4.0/>).
